# Supplementary material for: Arsenic Adsorption and Desorption in Various Aqueous Media in the Nearshore Zone and Influencing Factors
Source: MDPI journal article supplement (doi:10.3390/su141710935), 2022-09-01
Supplement: s1 [file s1]

**Supplementary Materials:** The following supporting information can be got as follows.

**Table S1.** Summary of batch adsorption experiment conditions.

| No. | pH | Temperature (°C) | NaHCO <sub>3</sub> (mmol/L) | NaCl (mol/L) |
|-----|----|------------------|-----------------------------|--------------|
| 1   | 2  | 13               | - *                         | -            |
| 2   | 4  | 13               | -                           | -            |
| 3   | 6  | 13               | -                           | -            |
| 4   | 8  | 13               | -                           | -            |
| 5   | 10 | 13               | -                           | -            |
| 6   | 12 | 13               | -                           | -            |
| 7   | 8  | 5                | -                           | -            |
| 8   | 8  | 10               | -                           | -            |
| 9   | 8  | 15               | -                           | -            |
| 10  | 8  | 20               | -                           | -            |
| 11  | 8  | 25               | -                           | -            |
| 12  | 8  | 30               | -                           | -            |
| 13  | 8  | 13               | 1                           | -            |
| 14  | 8  | 13               | 10                          | -            |
| 15  | 8  | 13               | 25                          | -            |
| 16  | 8  | 13               | 50                          | -            |
| 17  | 8  | 13               | 100                         | -            |
| 18  | 8  | 13               | -                           | 1            |
| 19  | 8  | 13               | -                           | 5            |
| 20  | 8  | 13               | -                           | 10           |
| 21  | 8  | 13               | -                           | 15           |
| 22  | 8  | 13               | -                           | 20           |
| 23  | 8  | 13               | -                           | 25           |

\* a dash indicates that this component was not added.

**Table S2.** Summary of batch desorption experiment conditions.

| No. | pH | Temperature (°C) | NaHCO <sub>3</sub> (mmol/L) |
|-----|----|------------------|-----------------------------|
| 1   | 2  | 13               | - *                         |
| 2   | 4  | 13               | -                           |
| 3   | 6  | 13               | -                           |
| 4   | 8  | 13               | -                           |
| 5   | 10 | 13               | -                           |
| 6   | 12 | 13               | -                           |
| 7   | 8  | 5                | -                           |
| 8   | 8  | 10               | -                           |
| 9   | 8  | 15               | -                           |
| 10  | 8  | 20               | -                           |
| 11  | 8  | 25               | -                           |
| 12  | 8  | 30               | -                           |
| 13  | 8  | 13               | 1                           |
| 14  | 8  | 13               | 10                          |
| 15  | 8  | 13               | 25                          |
| 16  | 8  | 13               | 50                          |
| 17  | 8  | 13               | 100                         |

\* a dash indicates that this component was not added.

**Table S3.** Adsorption and desorption ratio of arsenic at equilibrium under different influencing factors.

| pH | Adsorption ratio (%) | Desorption ratio (%) | Temperature (°C) | Adsorption ratio (%) | Desorption ratio (%) | HCO <sub>3</sub> <sup>-</sup> concentration (mmol/L) | Adsorption ratio (%) | Desorption ratio (%) |
|----|----------------------|----------------------|------------------|----------------------|----------------------|------------------------------------------------------|----------------------|----------------------|
| 2  | 40.36                | 21.99                | 5                | 43.33                | 9.23                 | 1                                                    | 74.97                | 16.90                |
| 4  | 41.70                | 19.18                | 10               | 56.67                | 11.76                | 10                                                   | 62.83                | 20.31                |
| 6  | 52.18                | 12.42                | 15               | 68.04                | 13.19                | 25                                                   | 48.77                | 27.34                |
| 8  | 91.19                | 4.81                 | 20               | 71.33                | 14.02                | 50                                                   | 39.73                | 36.07                |
| 10 | 66.32                | 29.39                | 25               | 74.33                | 16.14                | 100                                                  | 29.59                | 54.09                |
| 12 | 39.68                | 50.40                | 30               | 83.65                | 16.34                |                                                      |                      |                      |
